# Supplementary material for: Rylene Dye-Loaded Polymeric Nanoparticles for Photothermal Eradication of Harmful Dinoflagellates, Akashiwo sanguinea and Alexandrium pacificum
Source: MDPI journal article supplement (doi:10.3390/bioengineering9040170), 2022-04-11
Supplement: s1 [file s1]

## Supporting Information

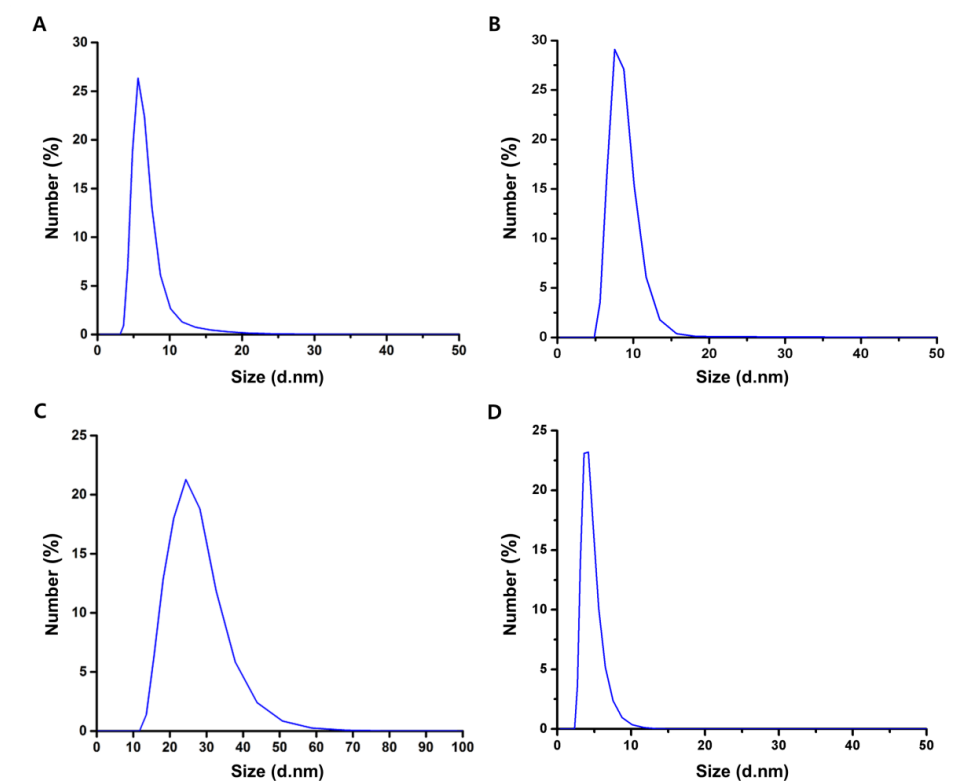

**Figure S1.** Particle size distribution of (A) LV-sIPN NP, (B) LV-micelle NP, (C) IR788-sIPN NP and (D) IR788-micelle measured by dynamic light scattering.

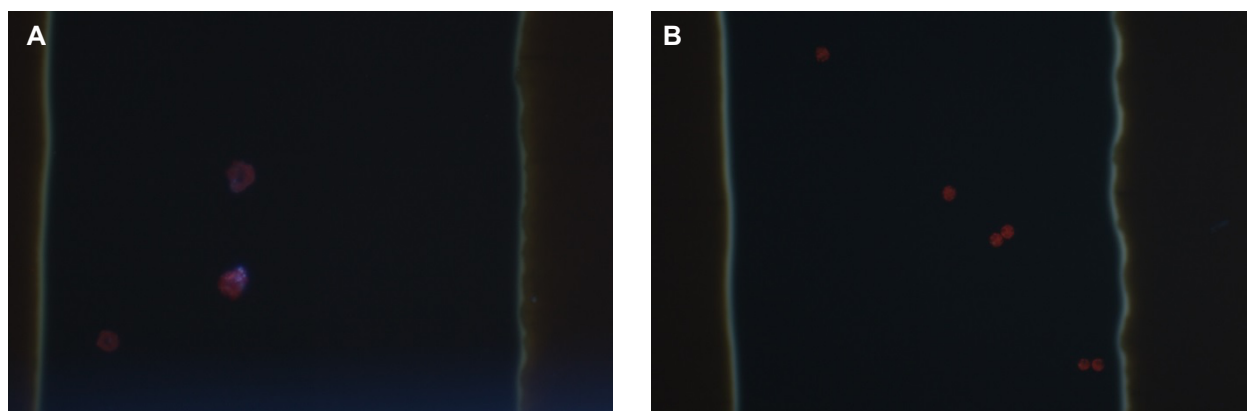

**Figure S2.** Fluorescence microscopy images of dinoflagellates feeding on LV-sIPN NPs. (A) *Akashiwo sanguinea*, (B) *Alexandrium pacificum*. The self-fluorescence of the cell is red and the LV-sIPN NPs are blue.

**Table S1.** Absorbance of LV-sIPN NP, LV-micelle NP, IR788-sIPN NP and IR788-micelle NP samples before and after CMT test.

| Sample               | Absorbance <sup>a</sup> of sample stored at |           | Ratio intensity<br>(4°C/ 25°C) |
|----------------------|---------------------------------------------|-----------|--------------------------------|
|                      | 25°C (RT)                                   | 4°C (CMT) |                                |
| 0.002% LV sIPN NP    | 0.5569                                      | 0.5454    | 0.979                          |
| 0.002% LV micelle NP | 0.1620                                      | 0.1299    | 0.802                          |
| 3% IR788 sIPN NP     | 2.3330                                      | 2.2490    | 0.964                          |
| 3% IR788 micelle NP  | 2.4689                                      | 0.2260    | 0.092                          |

<sup>a</sup> O.D. values at 377 and 716 nm for LV and IR788, respectively.
